# Supplementary material for: Dysregulated balance of D- and L-amino acids modulating glutamatergic neurotransmission in severe spinal muscular atrophy
Source: PubMed Central journal article supplement — bioRxiv. 2024 Oct 22:2024.10.22.619645. Preprint. [Version 1] doi: 10.1101/2024.10.22.619645 (PMC11526884; doi:10.1101/2024.10.22.619645), 2024-10-22
Supplement: media-1.pdf [file media-1.pdf]

1 *Supplemental information for*

2

3 **Dysregulated balance of D- and L-amino acids modulating glutamatergic neurotransmission**  
4 **in severe spinal muscular atrophy**

5

6 Amber Hassan<sup>1,2,\*</sup>, Raffaella di Vito<sup>1,3,\*</sup>, Tommaso Nuzzo<sup>1,3,\*</sup>, Matteo Vidali<sup>4</sup>, Maria Jose Carlini<sup>5</sup>,  
7 Shubhi Yadav<sup>5</sup>, Hua Yang<sup>5</sup>, Adele D'Amico<sup>6</sup>, Xhesika Kolic<sup>7,8</sup>, Valeria Valsecchi<sup>7</sup>, Chiara  
8 Panicucci<sup>9</sup>, Giuseppe Pignataro<sup>7</sup>, Claudio Bruno<sup>9,10</sup>, Enrico Bertini<sup>6</sup>, Francesco Errico<sup>1,11</sup>, Livio  
9 Pellizzoni<sup>5,12,13</sup>, Alessandro Usiello<sup>1,3,@</sup>

10

11 <sup>1</sup>Laboratory of Translational Neuroscience, Ceinge Biotechnologie Avanzate, 80145, Naples, Italy.

12 <sup>2</sup>European School of Molecular medicine, University of Milan, Milan, Italy

13 <sup>3</sup>Department of Environmental, Biological and Pharmaceutical Science and Technologies, Università  
14 degli Studi della Campania "Luigi Vanvitelli", 81100, Caserta, Italy.

15 <sup>4</sup>Clinical Pathology Unit, Fondazione IRCCS Ca' Granda Ospedale Maggiore Policlinico, Milano,  
16 Italy.

17 <sup>5</sup>Department of Neurology, Columbia University, New York, NY, USA. 10

18 <sup>6</sup>Unit of Neuromuscular and Neurodegenerative Disorders, Dept. Neurosciences, Bambino Gesù'  
19 Children's Hospital IRCCS, Roma, Italy.

20 <sup>7</sup>Division of Pharmacology, Department of Neuroscience, Reproductive and Dentistry Sciences,  
21 School of Medicine, University of Naples "Federico II", 80131, Naples, Italy.

22 <sup>8</sup>School of Advanced Studies, Centre for Neuroscience, University of Camerino, Italy.

23 <sup>9</sup>Center of Translational and Experimental Myology, IRCCS Istituto Giannina Gaslini, Genova, Italy.

24 <sup>10</sup>Department of Neuroscience, Rehabilitation, Ophthalmology, Genetics, Maternal, and Child Health  
25 - DINOEMI, University of Genova

26 <sup>11</sup>Department of Agricultural Sciences, University of Naples "Federico II", Portici, 80055, Italy.

27 <sup>12</sup>Center for Motor Neuron Biology and Disease, Columbia University, New York, NY, USA.

28 <sup>13</sup>Department of Pathology and Cell Biology, Columbia University, New York, NY, USA.

29

30 \*These authors contributed equally to this work.

31

32 @Alessandro Usiello, Ph.D.: Department of Environmental, Biological and Pharmaceutical Sciences  
33 and Technologies, University of Campania "Luigi Vanvitelli", Via A. Vivaldi, 43, 81100 Caserta,  
34 Italy, and CEINGE Biotechnologie Avanzate, Naples, Italy; Phone: +39 0813737879, email:  
35 [usiello@ceinge.unina.it](mailto:usiello@ceinge.unina.it).

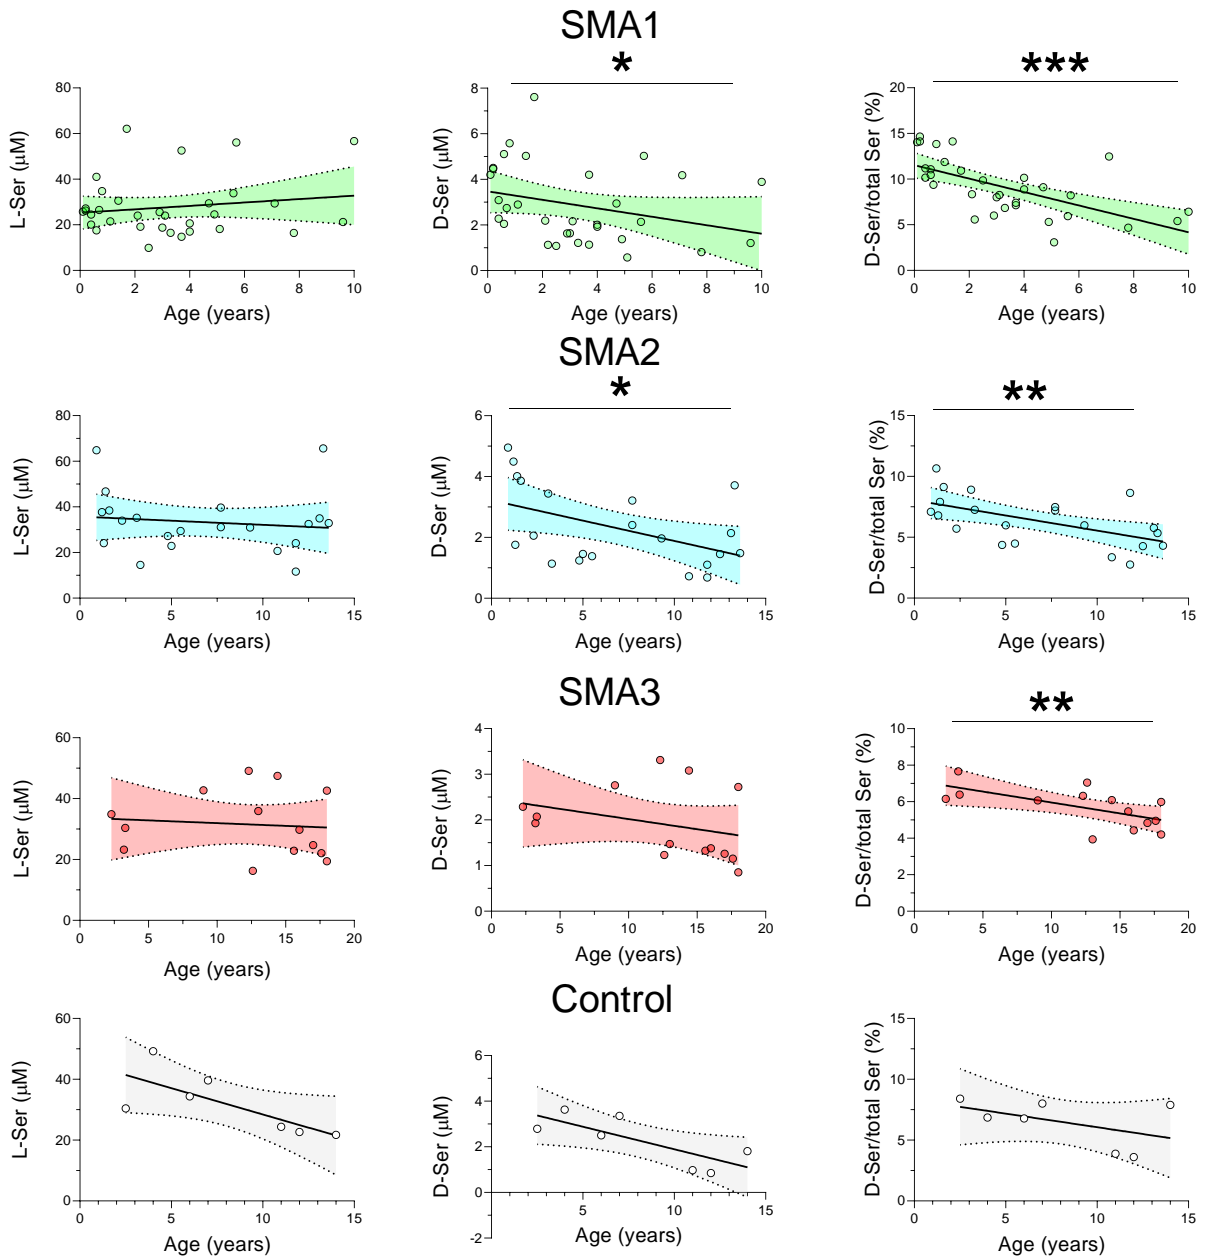

36  
 37 **Suppl Fig 1:** Correlation between age and amino acid concentrations in naive cohorts of SMA1,  
 38 SMA2 and SMA3 patients as well as normal controls. Association between L-Ser, D-Ser, or D-Ser/tot  
 39 Ser ratio with age of SMA1, SMA2, SMA3, and control individuals. \* $P < 0.05$ , \*\* $P < 0.01$ , \*\*\* $P <$   
 40  $0.0001$ , Spearman correlation.  
 41  
 42  
 43  
 44  
 45  
 46  
 47  
 48  
 49  
 50  
 51



60  
61  
62  
63  
64

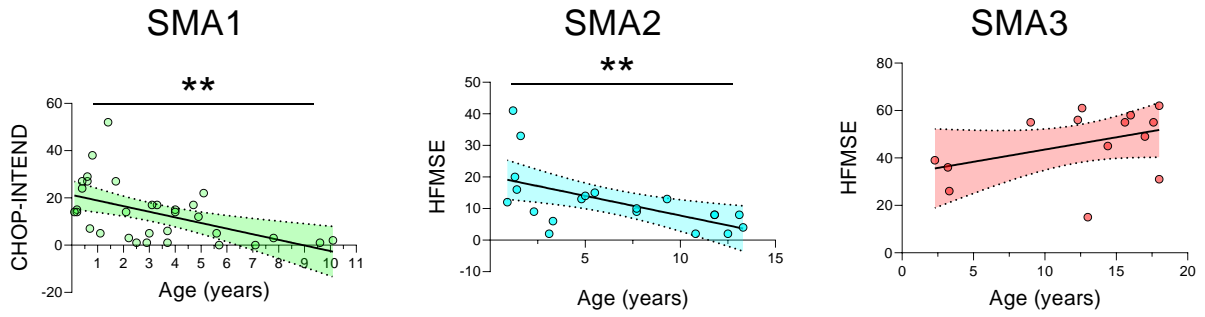

65  
66  
67  
68  
69  
70  
71  
72  
73  
74  
75  
76  
77  
78  
79  
80  
81  
82  
83  
84  
85  
86  
87  
88  
89  
90  
91

**Suppl Fig 3:** Correlation of CHOP-INTEND or HFMSE with age of naive SMA1, SMA2 and SMA3 patients.  $**P < 0.01$ , Spearman correlation.

## SMA2

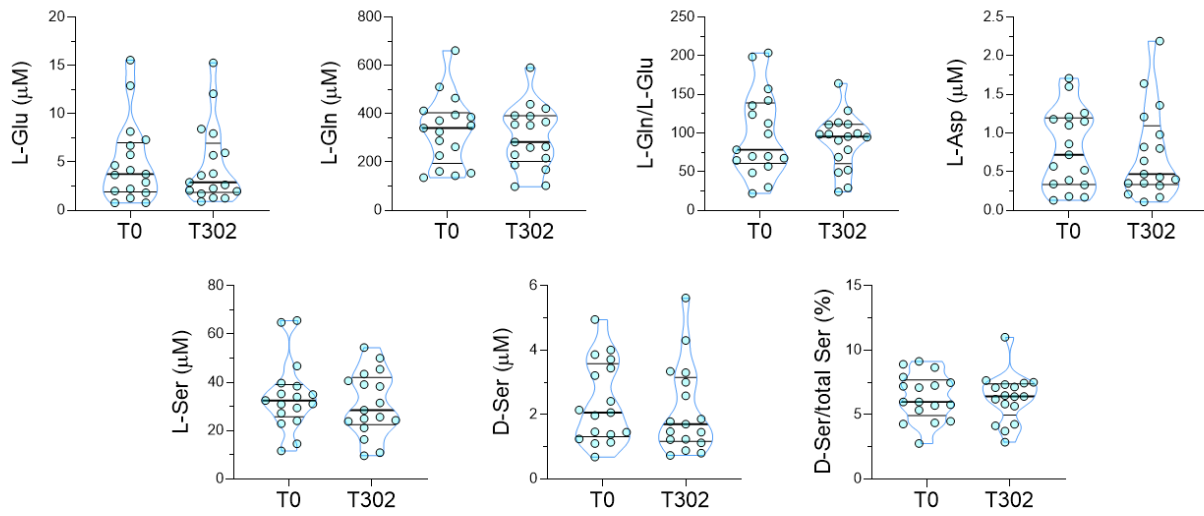

92  
93  
94

95 **Suppl Fig 4:** Effect of Nusinersen on amino acids levels in the CSF of SMA2 patients. Levels of L-  
96 glutamate (L-Glu), L-glutamine (L-Gln), L-glutamine/L-glutamate ratio (L-Gln/L-Glu), L-aspartate  
97 (L-Asp), L-serine (L-Ser), D-serine (D-Ser) and D-serine/total serine (L-Ser/total Ser) percentage in  
98 the CSF of SMA2 patients prior to treatment (T0,  $n = 17$ ) and at the time of the sixth (T302,  $n = 17$ )  
99 injection of Nusinersen. Data are shown as violin plots representing median with interquartile range  
100 (IQR). Dots represent individual patients' values.

101

102

103

104

105

106

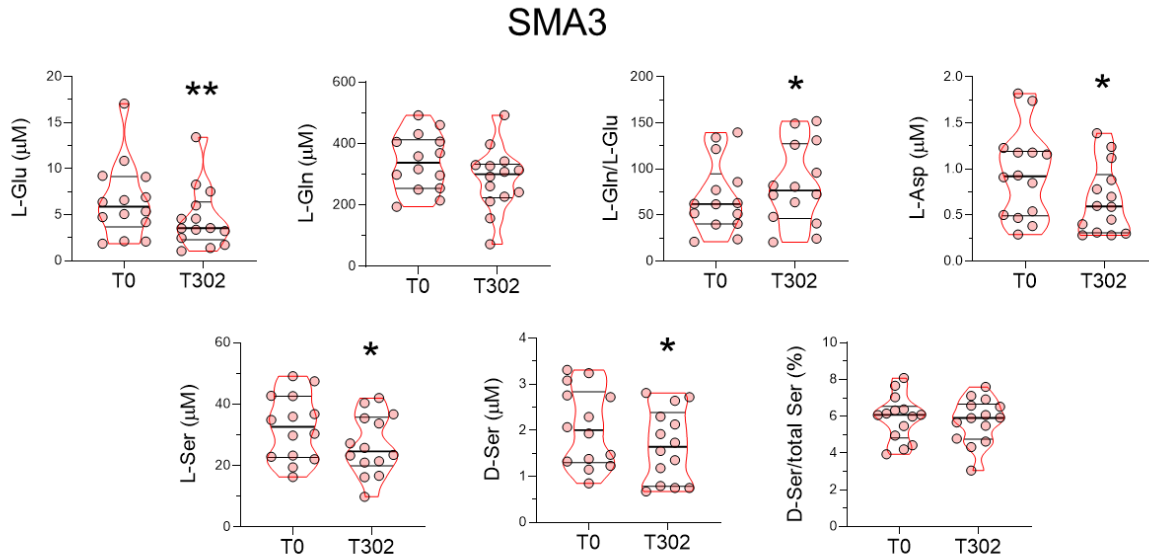

107

108

109

110 **Suppl Fig 5:** Effect of Nusinersen on amino acids levels in CSF of SMA3 patients. Levels of of L-  
111 glutamate (L-Glu), L-glutamine (L-Gln), L-glutamine/L-glutamate (L-Gln/L-Glu) ratio, L-aspartate  
112 (L-Asp), L-serine (L-Ser), D-serine (D-Ser) and D-serine/total serine (L-Ser/total Ser) percentage  
113 ratio in the CSF of SMA3 patients prior to treatment (T0,  $n = 14$ ) and at the time of the sixth (T302,  
114  $n = 14$ ) injection of Nusinersen.  $*P < 0.05$ ,  $**P < 0.01$ , compared to T0 (Wilcoxon matched-pairs signed  
115 ranks test). Data are shown as violin plots representing median with interquartile range (IQR). Dots  
116 represent individual patients' values.

117

118

119

120

121

122

# SMA1 (T302)

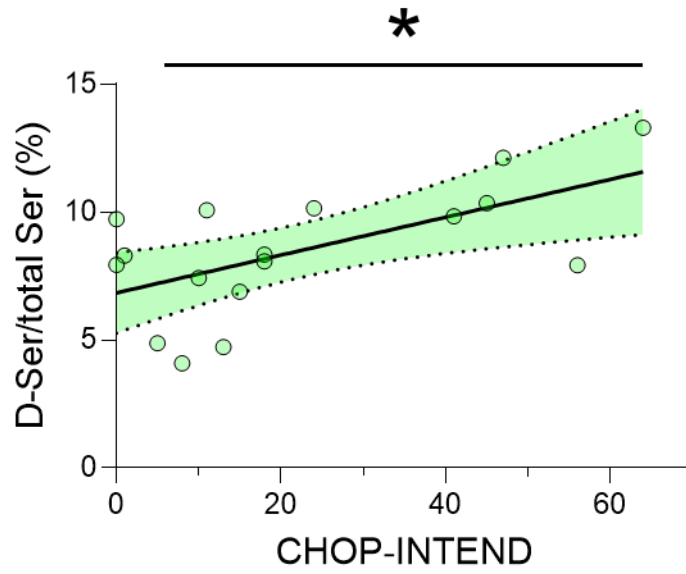

123  
124 **Suppl Fig 6:** Effect of Nusinersen on the association between D-serine/total serine (L-Ser/total Ser)  
125 percentage and CHOP-INTEND of SMA1 patients. \* $P < 0.05$ , Spearman correlation.  
126

127  
128  
129  
130

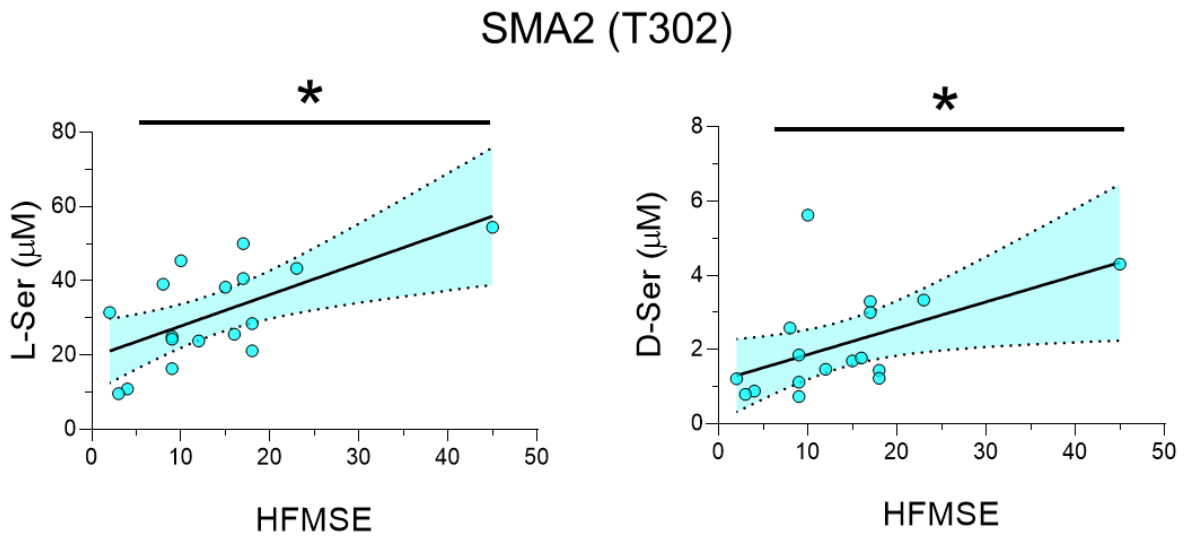

131  
132  
133  
134  
135  
136

**Suppl Fig 7:** Effect of Nusinersen on the association between L-Ser or D-Ser and HFMSE of SMA2 patients. \* $P < 0.05$ , Spearman correlation.



137  
138

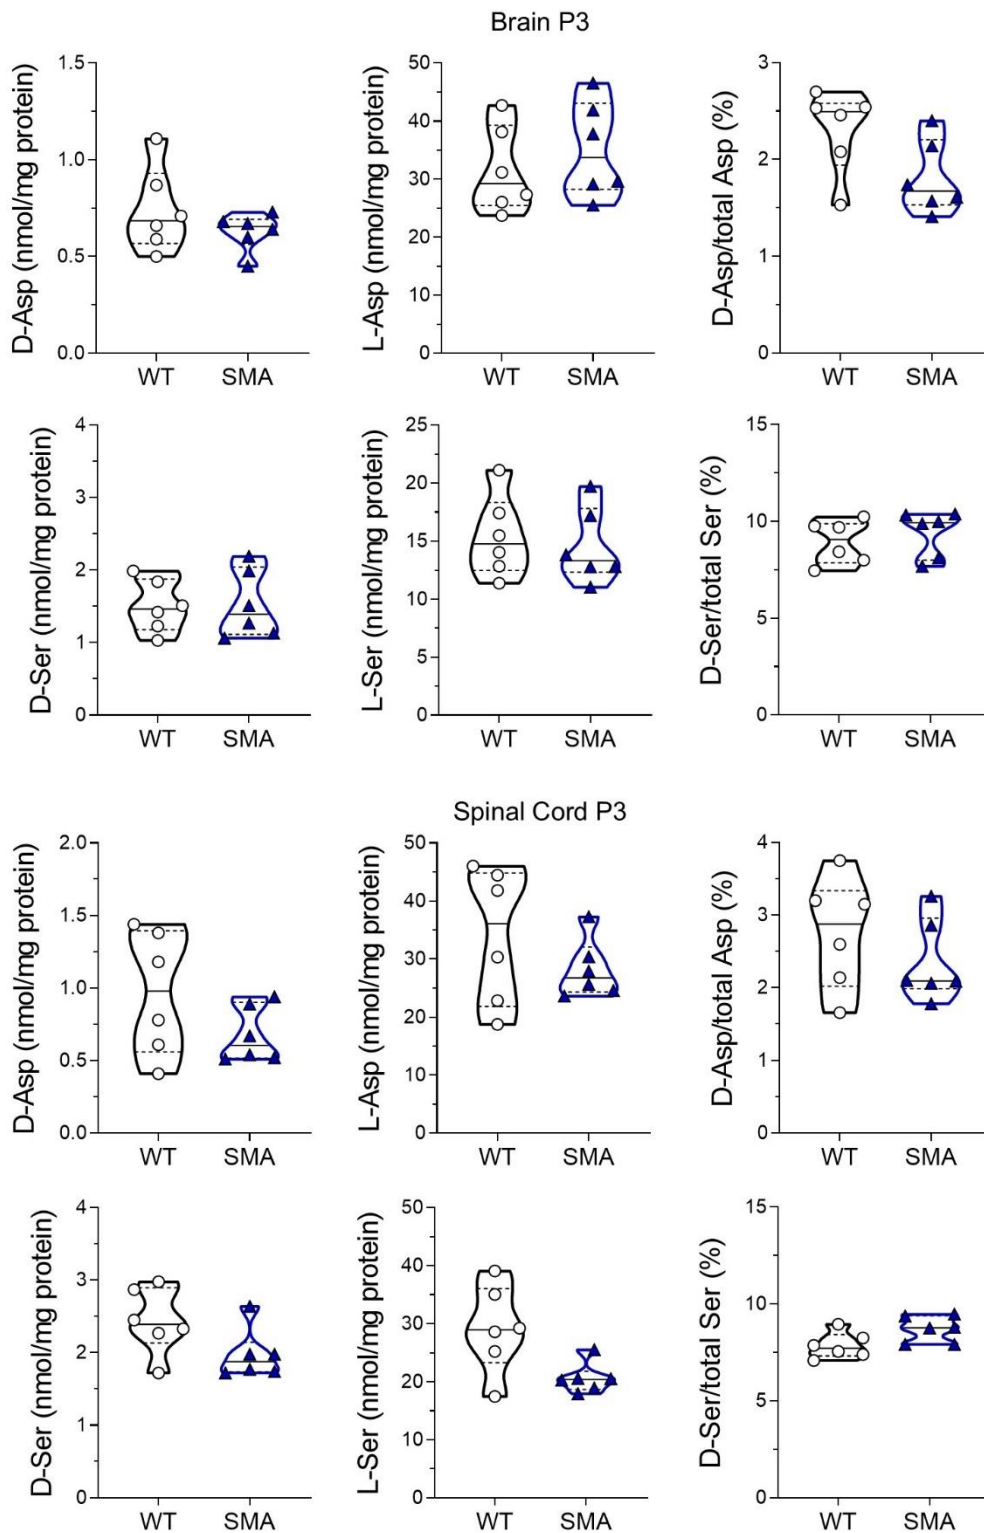

139  
140  
141  
142  
143  
144  
145

**Suppl Fig 8:** Analysis of D-aspartate (D-Asp), L-aspartate (L-Asp), D-serine (D-Ser) and L-serine (L-Ser) and their relative ratios between WT and SMA mice in the brain and spinal cord at P3. The average amounts of amino acids detected were normalized for mg of proteins. Dots represent values from individual mice. Amino acids levels are expressed as violin plots representing median with interquartile range (IQR) and analyzed by Mann-Whitney.

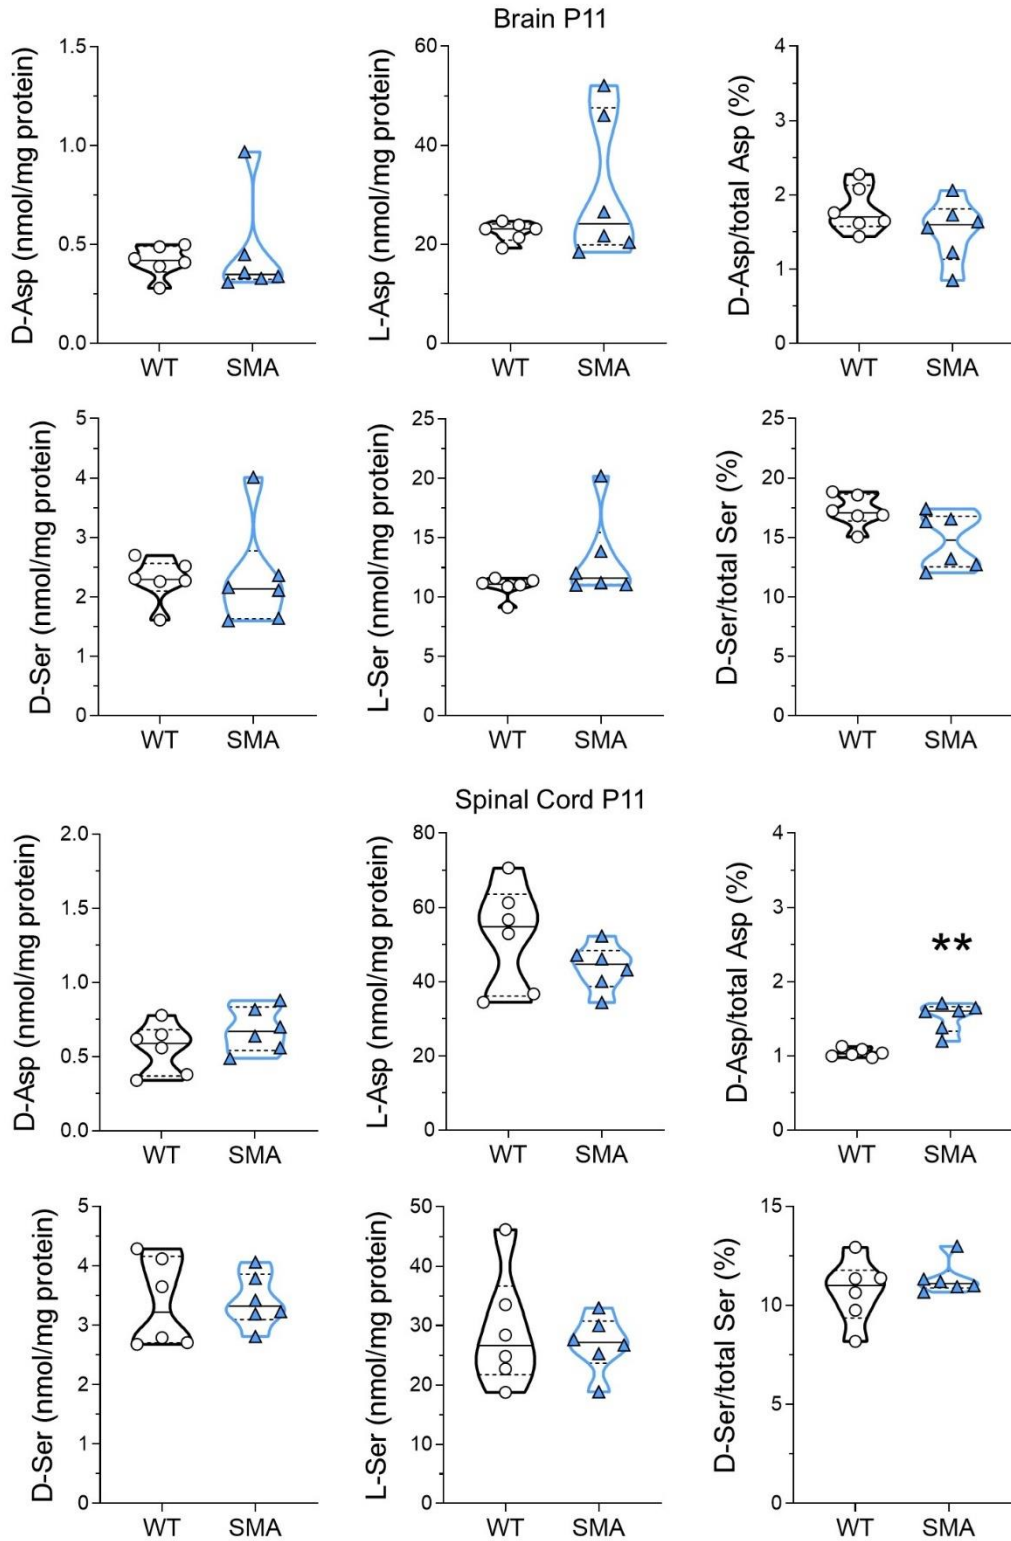

146  
147  
148  
149  
150  
151  
152

**Suppl Fig 9:** Analysis of D-aspartate (D-Asp), L-aspartate (L-Asp), D-serine (D-Ser) and L-serine (L-Ser) and their relative ratios between WT and SMA mice in the brain and spinal cord at P11. The average amounts of amino acids detected were normalized for mg of proteins. Dots represent values from individual mice. Amino acids levels are expressed as violin plots representing median with

153 interquartile range (IQR) and analyzed by Mann-Whitney.  $**P < 0.01$ , compared to age-matched WT  
154 mice.  
155

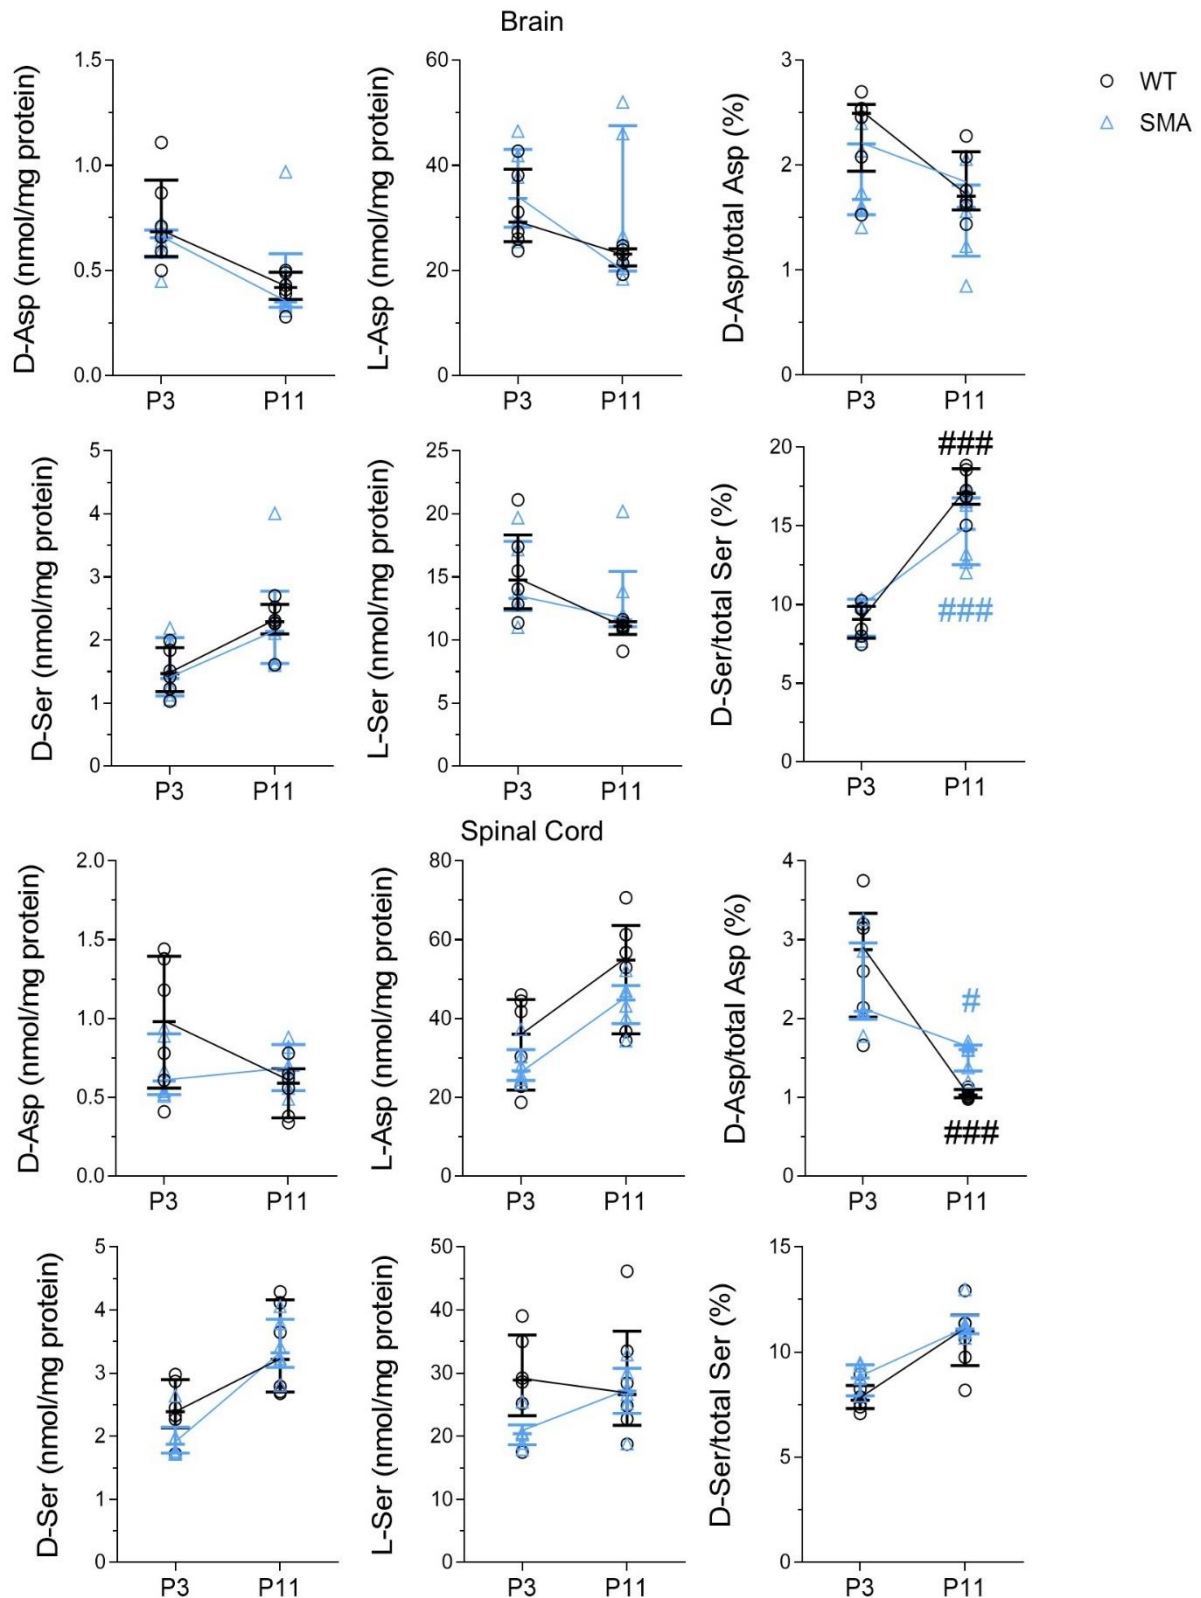

156

157 **Suppl Fig 10:** Analysis of D-aspartate (D-Asp), L-aspartate (L-Asp), D-serine (D-Ser) and L-serine  
 158 (L-Ser) and their relative ratios between WT and SMA mice at P3 and P11 analyzed by two-way  
 159 ANOVA followed by Tukey's multiple comparisons test. # $P < 0.05$ , ### $P < 0.01$ , P11 compared to  
 160 genotype-matched P3 mice. Amino acids levels were shown as scatter dot plots representing median  
 161 with interquartile range (IQR) while dots represent individual animals' values.

**Supplementary Table 1.** Amino acids levels in controls and SMA patients.

| Amino acids         | Controls ( <i>n</i> = 7) | SMA1 ( <i>n</i> = 34) | SMA2 ( <i>n</i> = 22) | SMA3 ( <i>n</i> = 17) | Kruskal-Wallis ( <i>P</i> -value) <sup>a</sup> | Post-hoc analysis ( <i>P</i> -value) <sup>b</sup>                |
|---------------------|--------------------------|-----------------------|-----------------------|-----------------------|------------------------------------------------|------------------------------------------------------------------|
| L-Gln (μM)          | 257 (206-315)            | 256 (174-288)         | 307 (211-400)         | 312 (259-406)         | <b>0.023</b>                                   | SMA1 vs SMA3: <b>0.024</b>                                       |
| L-Glu (μM)          | 8.96 (5.28-9.34)         | 2.50 (1.11-5.04)      | 3.96 (2.15-6.86)      | 5.36 (2.29-9.16)      | <b>0.007</b>                                   | Controls vs SMA1: <b>0.024</b>                                   |
| L-Gln/L-Glu         | 27.5 (21.7-59.7)         | 120 (53.4-188)        | 74.2 (54.9-129)       | 62.3 (40.1-119)       | <b>0.005</b>                                   | Controls vs SMA1: <b>0.006</b><br>Controls vs SMA2: <b>0.036</b> |
| L-Asp (μM)          | 0.83 (0.40-0.87)         | 0.39 (0.23-0.67)      | 0.63 (0.34-1.16)      | 0.85 (0.43-1.18)      | <b>0.037</b>                                   |                                                                  |
| L-Ser (μM)          | 30.4 (22.7-39.6)         | 25.0 (19.1-34.1)      | 32.7 (24.1-38.7)      | 29.8 (23.1-39.7)      | 0.166                                          |                                                                  |
| D-Ser (μM)          | 2.50 (0.98-3.36)         | 2.47 (1.57-4.20)      | 2.01 (1.35-3.54)      | 1.93 (1.26-2.74)      | 0.374                                          |                                                                  |
| D-Ser/total Ser (%) | 6.86 (3.88-8.01)         | 8.61 (6.74-11.1)      | 6.39 (4.45-7.73)      | 6.07 (4.63-6.71)      | <b>&lt;0.001</b>                               | SMA1 vs SMA2: <b>0.012</b><br>SMA1 vs SMA3: <b>&lt;0.001</b>     |

Data are expressed as median (IQR). Analysis by non-parametric Kruskal-Wallis<sup>a</sup>, post-hoc analysis by Mann-Whitney with Bonferroni's correction<sup>b</sup>. L-Gln, L-Glu, L-Gln/L-Glu ratio, L-Asp, D-Ser/total Ser (%) levels were natural log transformed and ANCOVA analysis was performed, considering sex and age as possible confounders. At ANCOVA, only L-Glu (*P* = 0.006) and L-Glu/L-Gln ratio (*P* = 0.003) remain significantly associated. Abbreviation: L-glutamine (L-Gln), L-glutamate (L-Glu), L-glutamine/L-glutamate (L-Gln/L-Glu), L-aspartate (L-Asp), L-serine (L-Ser), D-serine (D-Ser), D-serine/total serine (D-Ser/total Ser).

**Supplementary Table 2.** Variations of amino acids at T0 vs T302 among SMA patients.

| Amino acids             | SMA1<br>T0 vs T302                                          | SMA2<br>T0 vs T302                        | SMA3<br>T0 vs T302                                          |
|-------------------------|-------------------------------------------------------------|-------------------------------------------|-------------------------------------------------------------|
| L-Gln ( $\mu\text{M}$ ) | 237 vs 285 ( <b><math>P = 0.025</math></b> ) ( $n = 18$ )   | 341 vs 283 ( $P = 0.758$ ) ( $n = 17$ )   | 338 vs 300 ( $P = 0.064$ ) ( $n = 14$ )                     |
| L-Glu ( $\mu\text{M}$ ) | 2.80 vs 3.70 ( <b><math>P = 0.035</math></b> ) ( $n = 18$ ) | 3.76 vs 2.91 ( $P = 0.831$ ) ( $n = 17$ ) | 5.87 vs 3.54 ( <b><math>P = 0.006</math></b> ) ( $n = 14$ ) |
| L-Gln/L-Glu             | 92.1 vs 102 ( $P = 0.777$ ) ( $n = 18$ )                    | 78.4 vs 95.5 ( $P = 0.492$ ) ( $n = 17$ ) | 62.0 vs 76.7 ( <b><math>P = 0.019</math></b> ) ( $n = 14$ ) |
| L-Asp ( $\mu\text{M}$ ) | 0.37 vs 0.57 ( $P = 0.287$ ) ( $n = 18$ )                   | 0.72 vs 0.47 ( $P = 0.379$ ) ( $n = 17$ ) | 0.92 vs 0.59 ( <b><math>P = 0.038</math></b> ) ( $n = 14$ ) |
| L-Ser ( $\mu\text{M}$ ) | 24.5 vs 35.4 ( <b><math>P = 0.004</math></b> ) ( $n = 18$ ) | 32.5 vs 28.5 ( $P = 0.586$ ) ( $n = 17$ ) | 32.6 vs 24.6 ( <b><math>P = 0.019</math></b> ) ( $n = 14$ ) |
| D-Ser ( $\mu\text{M}$ ) | 2.82 vs 2.83 ( $P = 0.248$ ) ( $n = 18$ )                   | 2.06 vs 1.70 ( $P = 0.492$ ) ( $n = 17$ ) | 2.00 vs 1.64 ( <b><math>P = 0.016</math></b> ) ( $n = 14$ ) |
| D-Ser/total Ser (%)     | 9.24 vs 8.19 ( <b><math>P = 0.007</math></b> ) ( $n = 18$ ) | 5.98 vs 6.41 ( $P = 0.653$ ) ( $n = 17$ ) | 6.08 vs 5.91 ( $P = 0.221$ ) ( $n = 14$ )                   |

Data are expressed as median.  $P$ -values are related to non-parametric Wilcoxon test. The number ( $n$ ) of patients is also indicated.

**Supplementary Table 3.** Levels of amino acids in the brain and spinal cord of wild type (WT) and SMN $\Delta$ 7 mice at P3 and P11.

|                 |                                    | BRAIN                            |                                  |                                         |                                         | SPINAL CORD                      |                                  |                                         |                                         |
|-----------------|------------------------------------|----------------------------------|----------------------------------|-----------------------------------------|-----------------------------------------|----------------------------------|----------------------------------|-----------------------------------------|-----------------------------------------|
|                 |                                    | P3                               |                                  | P11                                     |                                         | P3                               |                                  | P11                                     |                                         |
|                 |                                    | WT                               | SMA                              | WT                                      | SMA                                     | WT                               | SMA                              | WT                                      | SMA                                     |
| L-Glu           | Median<br>(IQR)<br><i>P</i> -value | 69.33<br>(59.58-88.42)<br>0.5887 | 71.51<br>(54.71-86.47)<br>0.5887 | 71.92<br>(64.26-73.90)<br>0.5887        | 67.07<br>(53.54-85.03)<br>0.5887        | 107.0<br>(78.22-129.5)<br>0.0931 | 77.42<br>(72.51-87.12)<br>0.0931 | 133.5<br>(103.7-151.8)<br>0.1797        | 107.5<br>(94.23-125.8)<br>0.1797        |
| L-Gln           | Median<br>(IQR)<br><i>P</i> -value | 48.58<br>(45.17-70.35)<br>0.5887 | 48.61<br>(40.17-54.23)<br>0.5887 | 37.21<br>(32.06-41.73)<br><b>0.0043</b> | 50.09<br>(46.70-62.42)<br><b>0.0043</b> | 274.3<br>(205.4-324.2)<br>0.0649 | 209.8<br>(194.7-216.0)<br>0.0649 | 152.6<br>(126.1-185.6)<br><b>0.0152</b> | 220.3<br>(192.5-255.8)<br><b>0.0152</b> |
| L-Gln/L-Glu     | Median<br>(IQR)<br><i>P</i> -value | 0.750<br>(0.663-0.875)<br>0.2900 | 0.620<br>(0.608-0.753)<br>0.2900 | 0.560<br>(0.468-0.633)<br><b>0.0022</b> | 0.740<br>(0.728-0.893)<br><b>0.0022</b> | 2.590<br>(2.500-2.678)<br>0.9697 | 2.585<br>(2.500-2.750)<br>0.9697 | 1.230<br>(1.070-1.313)<br><b>0.0022</b> | 1.995<br>(1.763-2.295)<br><b>0.0022</b> |
| D-Ser           | Median<br>(IQR)<br><i>P</i> -value | 1.465<br>(1.180-1.878)<br>0.9091 | 1.390<br>(1.113-2.040)<br>0.9091 | 2.290<br>(2.098-2.565)<br>0.4848        | 2.135<br>(1.630-2.773)<br>0.4848        | 2.390<br>(2.133-2.898)<br>0.1429 | 1.875<br>(1.735-2.145)<br>0.1429 | 3.220<br>(2.703-4.163)<br>0.8182        | 3.325<br>(3.095-3.858)<br>0.8182        |
| L-Ser           | Median<br>(IQR)<br><i>P</i> -value | 14.76<br>(12.48-18.34)<br>0.4848 | 13.31<br>(12.33-17.82)<br>0.4848 | 11.10<br>(10.44-11.45)<br>0.1797        | 11.61<br>(11.04-15.44)<br>0.1797        | 28.93<br>(23.28-36.04)<br>0.0931 | 20.40<br>(18.67-21.81)<br>0.0931 | 26.63<br>(21.73-36.67)<br>>0.9999       | 27.18<br>(23.65-90.76)<br>>0.9999       |
| D-Ser/total Ser | Median<br>(IQR)<br><i>P</i> -value | 9.065<br>(7.865-9.880)<br>0.3095 | 9.935<br>(8.003-10.34)<br>0.3095 | 17.07<br>(16.38-18.64)<br>0.0649        | 14.78<br>(12.54-16.77)<br>0.0649        | 7.715<br>(7.323-7.920)<br>0.0584 | 8.770<br>(8.425-9.398)<br>0.0584 | 11.01<br>(9.37-11.77)<br>0.6991         | 11.11<br>(10.88-11.75)<br>0.6991        |
| D-Asp           | Median<br>(IQR)<br><i>P</i> -value | 0.685<br>(0.567-0.930)<br>0.5887 | 0.655<br>(0.563-0.693)<br>0.5887 | 0.420<br>(0.363-0.493)<br>0.5887        | 0.350<br>(0.325-0.580)<br>0.5887        | 0.980<br>(0.560-1.395)<br>0.3095 | 0.605<br>(0.518-0.903)<br>0.3095 | 0.590<br>(0.370-0.683)<br>0.2576        | 0.670<br>(0.543-0.835)<br>0.2576        |
| L-Asp           | Median<br>(IQR)<br><i>P</i> -value | 29.25<br>(25.47-39.28)<br>0.5887 | 33.73<br>(28.24-43.07)<br>0.5887 | 23.13<br>(20.89-24.15)<br>0.6667        | 24.16<br>(19.94-47.58)<br>0.6667        | 36.08<br>(21.83-44.83)<br>0.5887 | 26.76<br>(24.33-32.09)<br>0.5887 | 54.85<br>(36.15-63.62)<br>0.2403        | 44.71<br>(38.68-44.71)<br>0.2403        |
| D-Asp/total Asp | Median<br>(IQR)<br><i>P</i> -value | 2.495<br>(1.943-2.580)<br>0.0931 | 1.675<br>(1.530-2.205)<br>0.0931 | 1.705<br>(1.575-2.130)<br>0.2403        | 1.600<br>(1.135-1.813)<br>0.2403        | 2.875<br>(2.020-3.338)<br>0.3939 | 2.095<br>(1.990-2.960)<br>0.3939 | 1.030<br>(0.995-1.100)<br><b>0.0022</b> | 1.605<br>(1.335-1.665)<br><b>0.0022</b> |

Data are expressed as median. *P*-values are related to non-parametric Mann-Whitney test, *n* = 6 animals per group.

**Supplementary Table 4.** Age effect on amino acids levels in the brain and spinal cord of wild type (WT) and SMA mice at P3 and P11.

|                 |             | BRAIN                |               |                                                                                                                                                        | SPINAL CORD         |               |                                                                                                                                                                 |
|-----------------|-------------|----------------------|---------------|--------------------------------------------------------------------------------------------------------------------------------------------------------|---------------------|---------------|-----------------------------------------------------------------------------------------------------------------------------------------------------------------|
|                 |             | F (DFn, DFd)         | P-value       | Tukey's multiple comparisons test                                                                                                                      | F (DFn, DFd)        | P-value       | Tukey's multiple comparisons test                                                                                                                               |
| L-Glu           | Interaction | F (1, 20) = 0.1622   | 0.6914        |                                                                                                                                                        | F (1, 20) = 0.029   | 0.8657        |                                                                                                                                                                 |
|                 | Age         | F (1, 20) = 0.1019   | 0.7529        |                                                                                                                                                        | F (1, 20) = 10.82   | 0.0037        |                                                                                                                                                                 |
|                 | Genotype    | F (1, 20) = 0.02570  | 0.8742        |                                                                                                                                                        | F (1, 20) = 6.201   | 0.0217        |                                                                                                                                                                 |
| L-Gln           | Interaction | F (1, 20) = 6.632    | <b>0.0181</b> | P3:SMA vs. P3:WT $P = 0.6519$<br>P3:SMA vs. P11:SMA $P = 0.6444$<br>P3:WT vs. P11:WT $P = 0.0978$<br>P11:SMA vs. P11:WT $P = 0.0955$                   | F (1, 20) = 13.45   | <b>0.0015</b> | P3:SMA vs. P3:WT $P = 0.0970$<br>P3:SMA vs. P11:SMA $P = 0.8975$<br>P3:WT vs. P11:WT $P = \mathbf{0.0012}$<br>P11:SMA vs. P11:WT $P = 0.0583$                   |
|                 | Age         | F (1, 20) = 0.8153   | 0.3773        |                                                                                                                                                        | F (1, 20) = 7.202   | 0.0143        |                                                                                                                                                                 |
|                 | Genotype    | F (1, 20) = 0.8474   | 0.3682        |                                                                                                                                                        | F (1, 20) = 0.03362 | 0.8564        |                                                                                                                                                                 |
| L-Gln/L-Glu     | Interaction | F (1, 20) = 14.71    | <b>0.001</b>  | P3:SMA vs. P3:WT $P = 0.4531$<br>P3:SMA vs. P11:SMA $P = 0.2055$<br>P3:WT vs. P11:WT $P = \mathbf{0.0145}$<br>P11:SMA vs. P11:WT $P = \mathbf{0.0043}$ | F (1, 20) = 20.21   | <b>0.0002</b> | P3:SMA vs. P3:WT $P > 0.9999$<br>P3:SMA vs. P11:SMA $P = \mathbf{0.0028}$<br>P3:WT vs. P11:WT $P < \mathbf{0.0001}$<br>P11:SMA vs. P11:WT $P < \mathbf{0.0001}$ |
|                 | Age         | F (1, 20) = 0.8907   | 0.3566        |                                                                                                                                                        | F (1, 20) = 106.2   | <0.0001       |                                                                                                                                                                 |
|                 | Genotype    | F (1, 20) = 2.913    | 0.1033        |                                                                                                                                                        | F (1, 20) = 19.89   | 0.0002        |                                                                                                                                                                 |
| D-Ser           | Interaction | F (1, 20) = 8.407E-4 | 0.9772        |                                                                                                                                                        | F (1, 20) = 1.440   | 0.2442        |                                                                                                                                                                 |
|                 | Age         | F (1, 20) = 11.56    | 0.0028        |                                                                                                                                                        | F (1, 20) = 31.61   | <0.0001       |                                                                                                                                                                 |
|                 | Genotype    | F (1, 20) = 0.01518  | 0.9032        |                                                                                                                                                        | F (1, 20) = 0.9909  | 0.3314        |                                                                                                                                                                 |
| L-Ser           | Interaction | F (1, 20) = 1.670    | 0.211         |                                                                                                                                                        | F (1, 20) = 1.317   | 0.2647        |                                                                                                                                                                 |
|                 | Age         | F (1, 20) = 5.610    | 0.028         |                                                                                                                                                        | F (1, 20) = 1.284   | 0.2706        |                                                                                                                                                                 |
|                 | Genotype    | F (1, 20) = 0.3861   | 0.5414        |                                                                                                                                                        | F (1, 20) = 3.733   | 0.0676        |                                                                                                                                                                 |
| D-Ser/total Ser | Interaction | F (1, 20) = 5.412    | <b>0.0306</b> | P3:SMA vs. P3:WT $P = 0.9557$<br>P3:SMA vs. P11:SMA $P < \mathbf{0.0001}$<br>P3:WT vs. P11:WT $P < \mathbf{0.0001}$<br>P11:SMA vs. P11:WT $P = 0.052$  | F (1, 20) = 0.06080 | 0.8077        |                                                                                                                                                                 |
|                 | Age         | F (1, 20) = 112.4    | <0.0001       |                                                                                                                                                        | F (1, 20) = 43.27   | <0.0001       |                                                                                                                                                                 |
|                 | Genotype    | F (1, 20) = 2.576    | 0.1242        |                                                                                                                                                        | F (1, 20) = 3.189   | 0.0893        |                                                                                                                                                                 |
| D-Asp           | Interaction | F (1, 20) = 1.118    | 0.3029        |                                                                                                                                                        | F (1, 20) = 3.824   | 0.0646        |                                                                                                                                                                 |
|                 | Age         | F (1, 20) = 11.25    | 0.0032        |                                                                                                                                                        | F (1, 20) = 3.702   | 0.0687        |                                                                                                                                                                 |
|                 | Genotype    | F (1, 20) = 0.2173   | 0.6461        |                                                                                                                                                        | F (1, 20) = 0.580   | 0.4551        |                                                                                                                                                                 |
| L-Asp           | Interaction | F (1, 20) = 0.3941   | 0.5372        |                                                                                                                                                        | F (1, 20) = 0.089   | 0.7685        |                                                                                                                                                                 |
|                 | Age         | F (1, 20) = 3.065    | 0.0953        |                                                                                                                                                        | F (1, 20) = 17.09   | 0.0005        |                                                                                                                                                                 |
|                 | Genotype    | F (1, 20) = 2.503    | 0.1293        |                                                                                                                                                        | F (1, 20) = 2.962   | 0.1007        |                                                                                                                                                                 |
| D-Asp/total Asp | Interaction | F (1, 20) = 0.4019   | 0.5333        |                                                                                                                                                        | F (1, 20) = 4.789   | <b>0.0407</b> | P3:SMA vs. P3:WT $P = 0.5209$<br>P3:SMA vs. P11:SMA $P = \mathbf{0.0363}$<br>P3:WT vs. P11:WT $P < \mathbf{0.0001}$<br>P11:SMA vs. P11:WT $P = 0.3463$          |
|                 | Age         | F (1, 20) = 6.351    | 0.0203        |                                                                                                                                                        | F (1, 20) = 40.51   | <0.0001       |                                                                                                                                                                 |
|                 | Genotype    | F (1, 20) = 6.142    | 0.0222        |                                                                                                                                                        | F (1, 20) = 0.05086 | 0.8239        |                                                                                                                                                                 |

Data were analyzed by two-way ANOVA, followed by Tukey's multiple comparisons test.
